# Supplementary material
Source: Springer Nature journal article supplement (https://www.springermedizin.de/resource/supplementary/13014_2011_408_MOESM3_ESM.pdf/9633728)

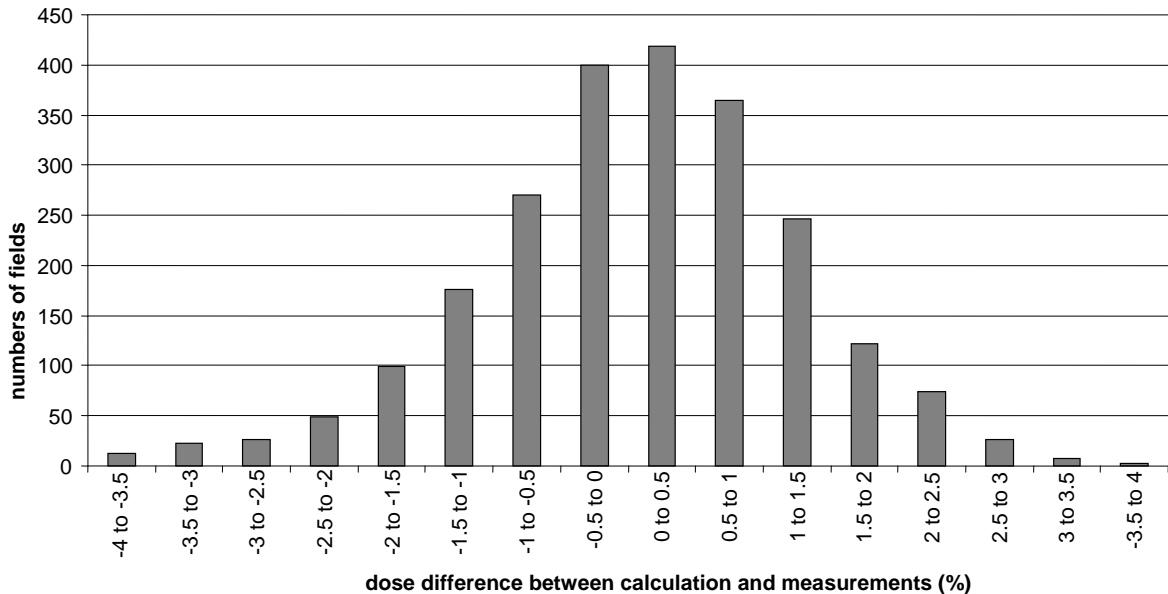

( a )

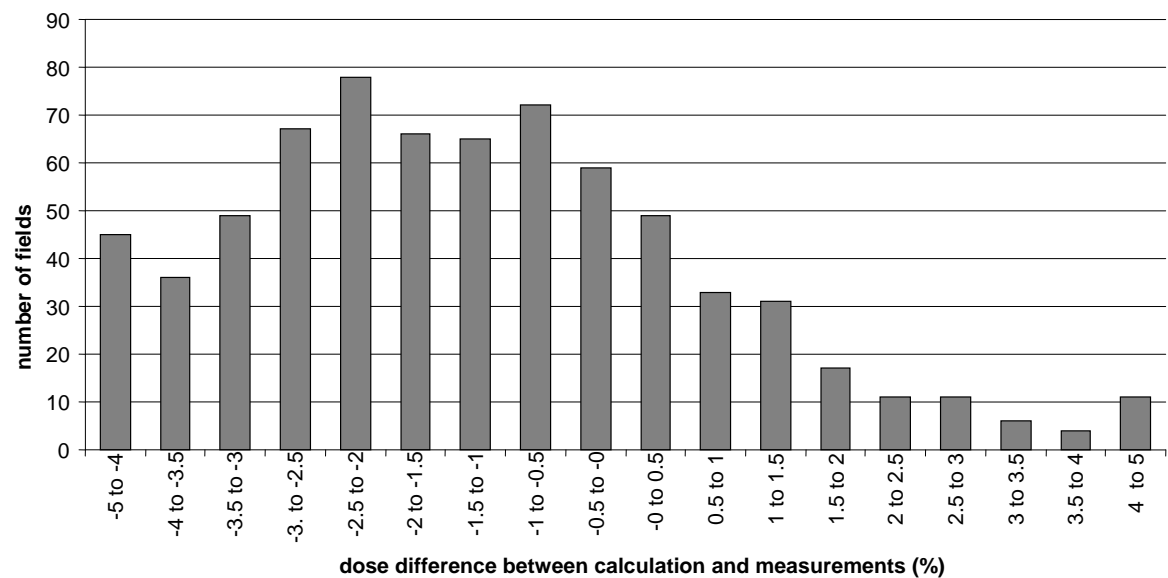

( b )

Supplement: MOESM3 [file 9633728]
